# Supplementary material for: Overexpression Of Hepatocyte Nuclear Factor-1beta Predicting Poor Prognosis Is Associated With Biliary Phenotype In Patients With Hepatocellular Carcinoma
Source: PubMed Central journal article supplement (PMC4550878; doi:10.1038/srep13319), 2015-08-27

**Overexpression Of Hepatocyte Nuclear Factor-1beta Predicting Poor Prognosis  
Is Associated With Biliary Phenotype In Patients With Hepatocellular  
Carcinoma**

**Authors:** Dan-Dan Yu<sup>1#</sup>, Ying-Ying Jing<sup>1#</sup>, Shi-Wei Guo<sup>1#</sup>, Fei Ye<sup>1</sup>, Wen Lu<sup>1</sup>, Quan Li<sup>1</sup>, Yu-Long Dong<sup>1</sup>, Lu Gao<sup>1</sup>, Yu-Ting Yang<sup>1</sup>, Yang Yang<sup>1</sup>, Meng-Chao Wu<sup>2\*</sup>, Li-Xin Wei<sup>1\*</sup>

**Author's affiliations:**

<sup>1</sup>Tumor Immunology and Gene Therapy Center, Eastern Hepatobiliary Surgery Hospital, The Second Military Medical University, Shanghai, China,

<sup>2</sup>Department of Comprehensive Treatment, Eastern Hepatobiliary Surgery Hospital, The Second Military Medical University, Shanghai, China,

**\*Corresponding author:** Li-Xin Wei, Tumor Immunology and Gene Therapy Center, Eastern Hepatobiliary Surgery Hospital, The Second Military Medical University, 225 Changhai Road, Shanghai, 200438 China, Tel.: +86 21 81875331; Fax: +86 21 65566349; E-mail: weilixin\_smmu@163.com.

And

Meng-Chao Wu, Department of Comprehensive Treatment, Eastern Hepatobiliary Surgery Hospital, The Second Military Medical University, NO. 225 Changhai Road, Shanghai, 200438 China, E-mail: wuyuz@yahoo.com.cn

<sup>#</sup>These authors contributed equally to this work.

## Supplemental Tables

**Supplemental table 1. HPC/biliary markers expression and clinicopathologic features in tumor tissue of 183 HCCs**

| Clinicopathologic features | K7           |              | P value | K19          |              | P value | EpCAM        |              | P value | OV6          |              | P value |
|----------------------------|--------------|--------------|---------|--------------|--------------|---------|--------------|--------------|---------|--------------|--------------|---------|
|                            | Low          | High         |         | Low          | High         |         | Low          | High         |         | Low          | High         |         |
| Frequency(%)               | 84<br>(45.9) | 99<br>(54.1) |         | 89<br>(48.6) | 94<br>(51.4) |         | 95<br>(51.9) | 88<br>(48.1) |         | 88<br>(48.1) | 95<br>(51.9) |         |
| Age(yr)                    |              |              |         |              |              |         |              |              |         |              |              |         |
| <50                        | 46           | 50           | 0.566   | 39           | 57           | 0.023*  | 42           | 54           | 0.020*  | 42           | 54           | 0.217   |
| ≥50                        | 38           | 49           |         | 50           | 37           |         | 53           | 34           |         | 46           | 41           |         |
| Gender                     |              |              |         |              |              |         |              |              |         |              |              |         |
| Male                       | 76           | 86           | 0.445   | 76           | 86           | 0.196   | 84           | 78           | 0.964   | 74           | 88           | 0.070   |
| Female                     | 8            | 13           |         | 13           | 8            |         | 11           | 10           |         | 14           | 7            |         |
| Tumor size                 |              |              |         |              |              |         |              |              |         |              |              |         |
| <5cm                       | 42           | 47           | 0.733   | 48           | 41           | 0.163   | 50           | 39           | 0.261   | 49           | 40           | 0.066   |
| ≥5cm                       | 42           | 52           |         | 41           | 53           |         | 45           | 49           |         | 39           | 55           |         |
| Tumor number               |              |              |         |              |              |         |              |              |         |              |              |         |
| Single                     | 74           | 85           | 0.655   | 79           | 80           | 0.464   | 87           | 72           | 0.051   | 77           | 82           | 0.813   |
| Multiple                   | 10           | 14           |         | 10           | 14           |         | 8            | 16           |         | 11           | 13           |         |
| Cirrhosis                  |              |              |         |              |              |         |              |              |         |              |              |         |
| No                         | 64           | 61           | 0.035*  | 64           | 61           | 0.308   | 68           | 57           | 0.323   | 68           | 57           | 0.012*  |
| Yes                        | 20           | 38           |         | 25           | 33           |         | 27           | 31           |         | 20           | 38           |         |
| HBsAg                      |              |              |         |              |              |         |              |              |         |              |              |         |
| Negative                   | 5            | 6            | 0.976   | 8            | 3            | 0.099   | 3            | 8            | 0.092   | 4            | 7            | 0.422   |
| Positive                   | 79           | 93           |         | 81           | 91           |         | 92           | 80           |         | 84           | 88           |         |
| TNM stage                  |              |              |         |              |              |         |              |              |         |              |              |         |
| I / II                     | 80           | 86           | 0.052   | 82           | 84           | 0.518   | 89           | 77           | 0.150   | 80           | 86           | 0.929   |
| III                        | 4            | 13           |         | 7            | 10           |         | 6            | 11           |         | 8            | 9            |         |
| Serum AFP                  |              |              |         |              |              |         |              |              |         |              |              |         |
| <400                       | 46           | 70           | 0.026*  | 53           | 63           | 0.294   | 71           | 45           | 0.001*  | 52           | 64           | 0.246   |
| ≥400                       | 38           | 29           |         | 36           | 31           |         | 24           | 43           |         | 36           | 31           |         |
| Histological grade         |              |              |         |              |              |         |              |              |         |              |              |         |
| Well /Moderate             | 67           | 66           | 0.048*  | 69           | 64           | 0.152   | 75           | 58           | 0.048*  | 67           | 66           | 0.312   |
| poorly                     | 17           | 33           |         | 20           | 30           |         | 20           | 30           |         | 21           | 29           |         |
| Lymphovascular invasion    |              |              |         |              |              |         |              |              |         |              |              |         |
| Negative                   | 34           | 32           | 0.252   | 37           | 29           | 0.131   | 37           | 29           | 0.399   | 35           | 31           | 0.315   |
| Positive                   | 50           | 67           |         | 52           | 65           |         | 58           | 59           |         | 53           | 64           |         |

\* $P < 0.05$  was considered statistically significant.

**Supplemental table 2. Univariate and multivariate analysis of OS in ICC patients**

| Variable                        | Number   | Univariate | Multivariate        |         |
|---------------------------------|----------|------------|---------------------|---------|
|                                 |          | analysis   | HR (95% CI)         | P value |
|                                 |          | P value    |                     |         |
| <b>Histology:</b>               |          |            |                     |         |
| Tumor HNF-1B expression         |          |            |                     |         |
| Low vs High                     | 23 vs 46 | 0.153      |                     | NA      |
| Non-tumor HNF-1B expression     |          |            |                     |         |
| Low vs High                     | 43 vs 26 | 0.298      |                     | NA      |
| <b>Clinical characteristics</b> |          |            |                     |         |
| Age(yr)                         |          |            |                     |         |
| <50 vs ≥50                      | 18 vs 51 | 0.252      |                     | NA      |
| Gender                          |          |            |                     |         |
| Male vs Female                  | 49 vs 20 | 0.227      |                     | NA      |
| Tumor size                      |          |            |                     |         |
| <5cm vs ≥5cm                    | 22 vs 47 | <0.001*    | 4.966(2.348,10.500) | <0.001* |
| Tumor number                    |          |            |                     |         |
| Single vs Multiple              | 57 vs 12 | 0.169      |                     | NA      |
| Cirrhosis                       |          |            |                     |         |
| No vs Yes                       | 48 vs 21 | 0.868      |                     | NA      |
| TNM stage                       |          |            |                     |         |
| I / II vs III                   | 50 vs 19 | 0.012*     | 2.660(1.354,5.228)  | 0.005*  |
| HBsAg                           |          |            |                     |         |
| Negative vs Positive            | 32 vs 37 | 0.681      |                     | NA      |
| Serum AFP                       |          |            |                     |         |
| <400 vs ≥400                    | 62 vs 7  | 0.527      |                     | NA      |
| Histological grade              |          |            |                     |         |
| Well / moderate vs poorly       | 56 vs 13 | 0.004*     |                     | NS      |
| Lymphovascular invasion         |          |            |                     |         |
| Negative vs Positive            | 42 vs 27 | 0.035*     |                     | NS      |

NA, not adopted; NS, not significant; HR, hazard ratio; Factors with  $p < 0.1$  in univariate analysis were adopted for further multivariate analysis. \* $P < 0.05$  was considered statistically significant.

**Supplemental table 3. Univariate and multivariate analysis of DFS in ICC patients**

| Variable                        | Number   | Univariate | Multivariate |         |
|---------------------------------|----------|------------|--------------|---------|
|                                 |          | analysis   | HR (95% CI)  | P value |
|                                 |          | P value    |              |         |
| <b>Histology:Tumor</b>          |          |            |              |         |
| Tumor HNF-1B expression         |          |            |              |         |
| Low vs High                     | 23 vs 46 | 0.891      |              | NA      |
| Non-tumor HNF-1B expression     |          |            |              |         |
| Low vs High                     | 43 vs 26 | 0.595      |              | NA      |
| <b>Clinical characteristics</b> |          |            |              |         |

|                           |          |        |                    |        |
|---------------------------|----------|--------|--------------------|--------|
| Age(yr)                   |          |        |                    |        |
| <50 vs ≥50                | 18 vs 51 | 0.138  |                    | NA     |
| Gender                    |          |        |                    |        |
| Male vs Female            | 49 vs 20 | 0.588  |                    | NA     |
| Tumor size                |          |        |                    |        |
| <5cm vs ≥5cm              | 22 vs 47 | 0.643  |                    | NA     |
| Tumor number              |          |        |                    |        |
| Single vs Multiple        | 57 vs 12 | 0.004* | 3.105(1.209,7.976) | 0.019* |
| Cirrhosis                 |          |        |                    |        |
| No vs Yes                 | 48 vs 21 | 0.355  |                    | NA     |
| TNM stage                 |          |        |                    |        |
| I / II vs III             | 50 vs 19 | 0.015* | 2.480(1.001,6.141) | 0.050* |
| HBsAg                     |          |        |                    |        |
| Negative vs Positive      | 32 vs 37 | 0.541  |                    | NA     |
| Serum AFP                 |          |        |                    |        |
| <400 vs ≥400              | 62 vs 7  | 0.461  |                    | NA     |
| Histological grade        |          |        |                    |        |
| Well / moderate vs poorly | 56 vs 13 | 0.057  |                    | NS     |
| Lymphovascular invasion   |          |        |                    |        |
| Negative vs Positive      | 42 vs 27 | 0.049* |                    | NS     |

NA, not adopted; NS, not significant; HR, hazard ratio; Factors with  $p < 0.1$  in univariate analysis were adopted for further multivariate analysis. \* $P < 0.05$  was considered statistically significant.

## Supplemental Materials and methods

### Cell culture and tumor cell infection

The human hepatocellular carcinoma cell lines HepG2, Huh7, Hep3B, LM3 and SMMC-7721 were obtained from the Cell Bank of Type Culture Collection of Chinese Academy of Sciences, Shanghai Institute of Cell Biology, Chinese Academy of Sciences. HepG2, Huh7, Hep3B, LM3 and SMMC-7721 cells were cultured in Dulbecco's modified Eagle's medium (high glucose) (Gibco, Grand Island, NY, USA) containing 10% fetal bovine serum(FBS) and 100 U/ml of penicillin/streptomycin (Gibco). All cells were incubated in a humidified incubator at 37 °C with 5% CO<sub>2</sub> and 95% air. Cells ( $1-3 \times 10^6$ ) grown to 50–60% confluence in 10cm Petri dishes were transfected with HNF-1B lentiviral expression vector or its corresponding mock sequences.

## RNA extraction and real-time quantitative PCR

Total RNA extraction, complementary DNA (cDNA) synthesis, and qPCR were performed as described previously<sup>1</sup>. The primer sequences used in the qPCR are shown in Supplemental table 4.

**Supplemental table 4. Sequences of RT-PCR oligonucleotide primers**

|        |   | Sequence (5'→3')         |
|--------|---|--------------------------|
| HNF-1B | F | GTGGACCGGATGCTCAGTG      |
|        | R | GGGTCTTCATAGGGGTGCC      |
| K7     | F | TCCGCGAGGTCACCATTAAC     |
|        | R | GCTCTGTCAACTCCGTCTCAT    |
| K19    | F | ACCAAGTTTGAGACGGAACAG    |
|        | R | CCCTCAGCGTACTGATTCCT     |
| EpCAM  | F | AATCGTCAATGCCAGTGTACTT   |
|        | R | TCTCATCGCAGTCAGGATCATAA  |
| Sox9   | F | AGCGAACGCACATCAAGAC      |
|        | R | CTGTAGGCGATCTGTTGGGG     |
| CD133  | F | AGTCGGAAACTGGCAGATAGC    |
|        | R | GGTAGTGTGTACTGGGCCAAT    |
| CD44   | F | CTGCCGCTTTGCAGGTGTA      |
|        | R | CATTGTGGGCAAGGTGCTATT    |
| CD90   | F | ATCGCTCTCCTGCTAACAGTC    |
|        | R | CTCGTACTGGATGGGTGAACT    |
| DAPDH  | F | TGCCAAATATGATGACATCAAGAA |
|        | R | GGAGTGGGTGTCGCTGTTG      |

## Supplemental References

- 1 Sun, T. *et al.* Expression and functional significance of Twist1 in hepatocellular carcinoma: its role in vasculogenic mimicry. *Hepatology* **51**, 545-556, doi:10.1002/hep.23311 (2010).

## Supplemental Figure legends

**Supplemental Figure 1. Kaplan-Meier analysis of K7 and K19 expression in HCC patients and HNF-1B expression in ICC patients.**

K7 and K19 low expression in HCC tissues was associated with prolonged overall

survival (A) and (B). No significant differences in DFS among the high and low K7/K19 expressing group was found in HCC patients. (C) No significant differences in OS among the high and low HNF1B expressing group was found in ICC patients. The P value calculated by the log-rank test is indicated.

**Supplemental Figure 2. Overexpression of HNF-1B in HCC cell lines increase biliary/HPC markers expression**

(A)HNF-1B mRNA levels were different in HCC cell lines Huh7, LM3, Hep3B, HepG2 and SMMC-7721. (B) SMMC-7721 cells were transfected with lentiviral vectors or its corresponding mock sequences to overexpress HNF-1B. RT-PCR was used to detect changes in the expression of biliary/HPC markers. Results represent means of triplicate experiments  $\pm$  standard errors ( $*P<0.05$ ).

**Supplemental Figures**

**Supplemental Figure 1**

**A**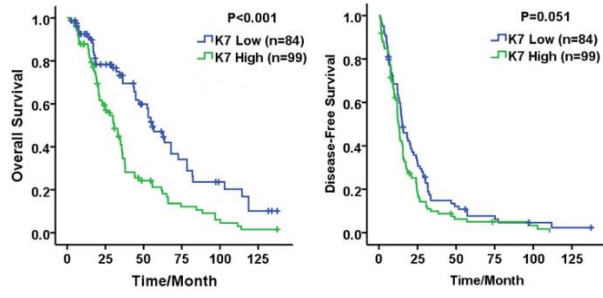**B**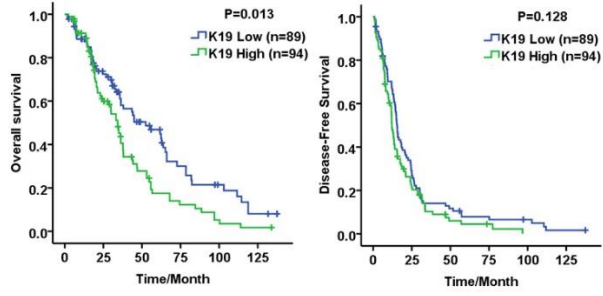**C**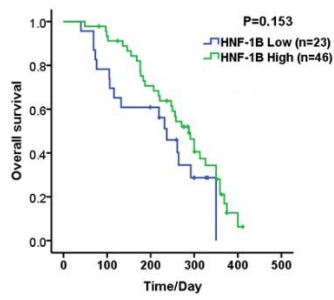

Supplemental Figure 2

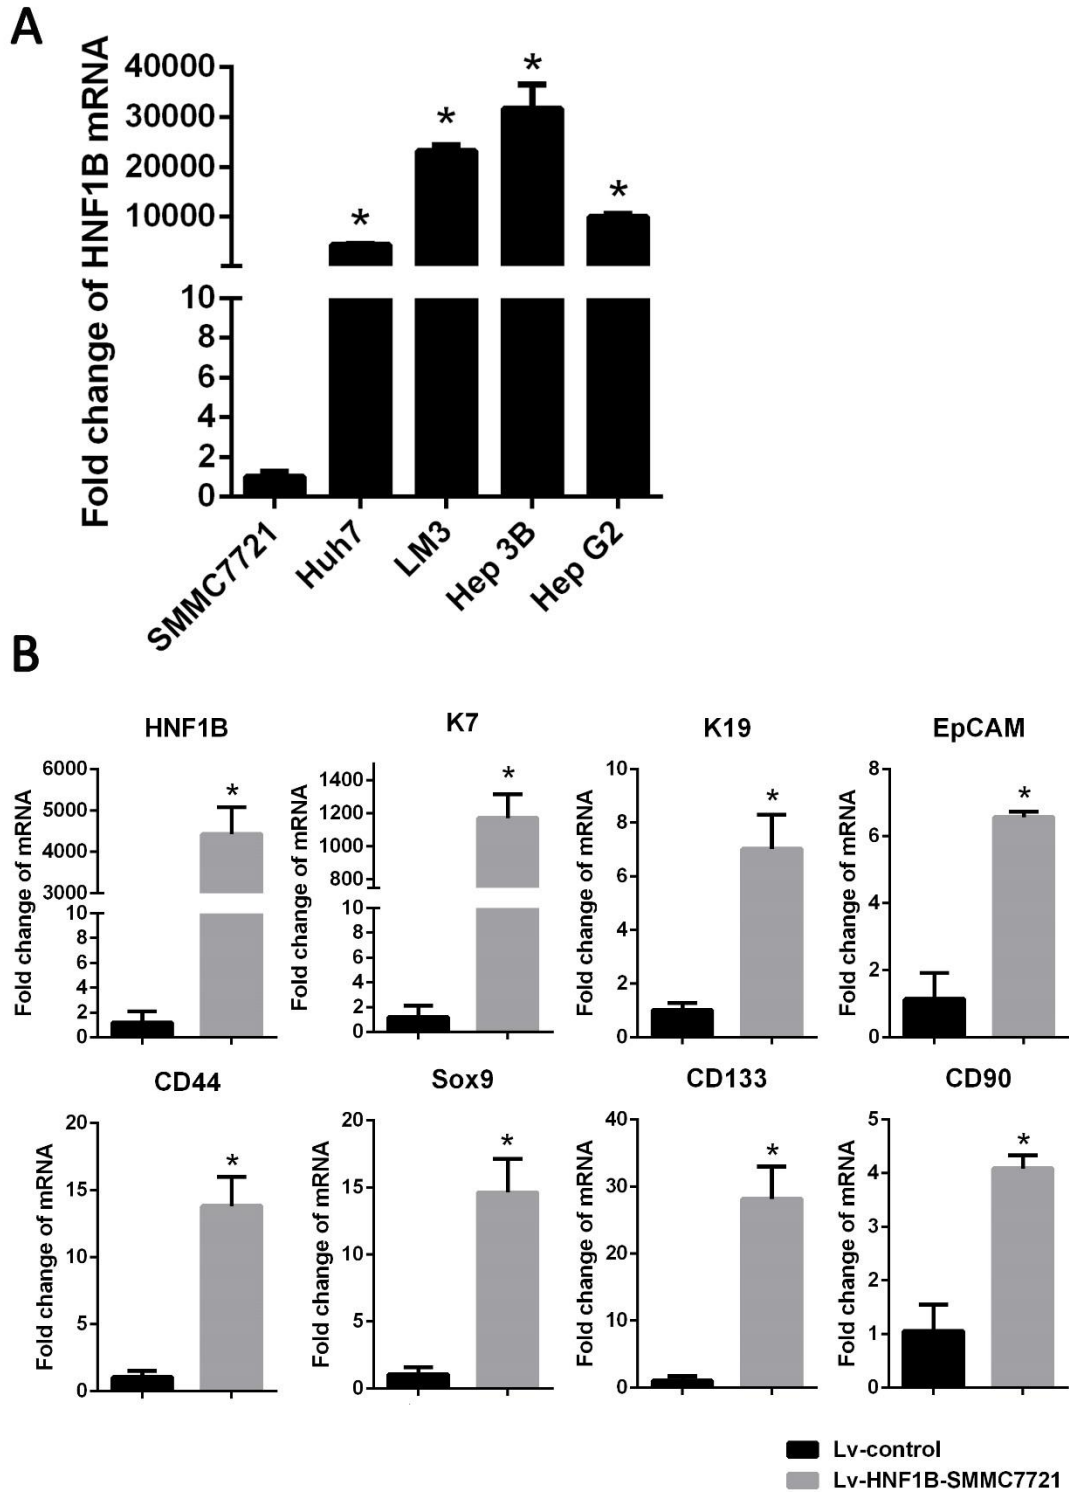

Supplement: srep13319-s1.pdf [file srep13319-s1.pdf]
